Ongo *et al*, 2013

## Ordered, Random, Monotonic, and Non-monotonic Digital Nanodot Gradients

Grant Ongo,<sup>1,2</sup> Sébastien G. Ricoult,<sup>2,3</sup> Timothy E. Kennedy,<sup>3</sup> and David Juncker<sup>1,2,3,\*</sup>

<sup>1</sup>Department of Biomedical Engineering, McGill University,  
740 Dr. Penfield Avenue, Montreal, Quebec, Canada H3A 0G1

<sup>2</sup>McGill University & Genome Quebec Innovation Centre, McGill University, Montréal, Quebec,  
Canada H3A 0G1

<sup>3</sup>McGill Program in Neuroengineering, Department of Neurology and Neurosurgery, Montreal  
Neurological Institute, McGill University, 3801 University Ave,  
Montreal, Quebec, Canada H3A 2B4

### Corresponding Author

David Juncker  
Dept. Biomedical Engineering  
Micro and Nanobioengineering Laboratory  
McGill University  
740 Dr. Penfield, room 6206  
Montreal, Quebec, Canada, H3A 0G1  
Phone: (514) 398-7676, Fax: (514) 398 1790  
Email: [david.juncker@mcgill.ca](mailto:david.juncker@mcgill.ca)

1

## ABSTRACT

2 Cell navigation is directed by inhomogeneous distributions of extracellular cues. It is well  
3 known that noise plays a key role in biology and is present in naturally occurring  
4 gradients at the micro- and nanoscale, yet it has not been studied with gradients *in vitro*.  
5 Here, we introduce novel algorithms to produce ordered and random gradients of  
6 discrete nanodots – called digital nanodot gradients (DNGs) – according to monotonic  
7 and non-monotonic density functions. The algorithms generate continuous DNGs, with  
8 dot spacing changing in two dimensions along the gradient direction according to  
9 arbitrary mathematical functions, with densities ranging from 0.02% to 44.44%. The  
10 random gradient algorithm compensates for random nanodot overlap, and the  
11 randomness and spatial homogeneity of the DNGs were confirmed with Ripley's K  
12 function. An array of 100 DNGs, each  $400 \times 400 \mu\text{m}^2$ , comprising a total of 57 million  
13  $200 \times 200 \text{ nm}^2$  dots was designed and patterned into silicon using electron-beam  
14 lithography, then patterned as fluorescently labeled IgGs on glass using lift-off  
15 nanocontact printing. DNGs will facilitate the study of the effects of noise and  
16 randomness at the micro- and nanoscales on cell migration and growth.

Ongo *et al*, 2013

## 1 **Introduction**

2 Gradients are fundamental to many phenomena of biology, from directing axonal  
3 navigation during neural development to the differentiation of stem cells in response to  
4 an injury [1,2]. Gradients may occur as either (i) free diffusion gradients, (ii) substrate-  
5 bound gradients, or (iii) a combination of both [3]. Free diffusion gradients can be  
6 generated by cell-excreted proteins that diffuse in the extracellular space. Substrate-  
7 bound gradients arise when proteins are bound to the extracellular matrix or cell  
8 membranes [4,5,6]. To better understand cellular haptotaxis – the directed movement of  
9 a cell or axonal growth cone along a gradient of a substrate-bound guidance cue – many  
10 techniques to generate surface-bound gradients *in vitro* have been developed [7]. Two  
11 classes of concentration gradients exist, namely continuous and digital gradients.  
12 Continuous gradients have protein concentration changing in a constant manner, and  
13 are typically produced by adsorbing molecules from a diffusible gradient. Several  
14 parameters of these gradients have been modulated, including the range and slope,  
15 which was linear, exponential or non-monotonic [8]. For example, linear gradients of the  
16 protein BDNF have been shown to modulate neuron polarization and growth [9] and  
17 linear laminin gradients have been shown to orient rat hippocampal axon specification  
18 based on slope [10]. Secondly, digital gradients which have been recently introduced,  
19 are formed by patterning small dots of protein and varying the density of the dots by  
20 changing their size [11], the spacing between them [12], or both [13]. The advantage of  
21 digital gradients is that they are deterministic, and that the local concentration can be  
22 precisely predicted and does not rely on fluorescence measurements which are prone to  
23 error. Digital gradients have been used to study how retinal ganglion cells identify the  
24 stop zone within graded distributions of repulsive EphrinA5 ligands [13]. However, digital  
25 gradients rarely extend over 1-2 orders of magnitude (OM), whereas it is believed that  
26 the dynamic range of gradients *in vivo* is between 3-4 OM. To overcome these

Ongo *et al*, 2013

27 limitations, we previously developed digital nanodot gradients (DNGs), where the  
28 spacing between nanodots (200 nm in diameter) was changed in two dimensions to  
29 produce a dynamic range exceeding 3 OM. These designs were implemented using a  
30 low-cost, lift-off nanocontact printing method to pattern substrate-bound gradients of  
31 proteins and peptides. We employed these patterns for adhesion and migration studies  
32 of C2C12 myoblasts on RGD peptide and netrin-1 gradients, respectively [14]. For these  
33 experiments, gradients of  $400 \times 400 \mu\text{m}^2$  were divided into 53 rectangular boxes of fixed  
34 size and density. With this approach, gradients were non-continuous and had stepwise  
35 changes in density. This is most pronounced in low-density regions where the spacing  
36 between nanodots exceeded the dimensions of the box, requiring larger box sizes and  
37 thus creating large “steps” at the bottom of the gradient. This may prove problematic as  
38 cells may fail to sense a discontinuous gradient if they fall into a region of constant  
39 density.

40

41 Noise is ubiquitous in biology [15], and modern patterning technologies can be exploited  
42 to introduce defined amounts of noise and randomness into otherwise regular patterns.  
43 The effect of randomness was evaluated in ordered arrays and repetitive patterns with a  
44 constant average density. In one study, disorder was introduced in arrays of 120 nm  
45 dots spaced 300 nm apart by randomly displacing the dot by up to 50% of the spacing to  
46 avoid overlap [16]. While this approach introduced a controlled amount of noise by  
47 restricting the maximum displacement, it was not random since dots were each  
48 contained within the original grid. Nonetheless, cellular adhesion and stem cell  
49 differentiation of osteoblasts were markedly altered as a result of increasing disorder. In  
50 another study, whole proteome analysis of cells grown on the same disordered patterns  
51 resulted in differential expression of certain proteins in the extracellular signal-regulated  
52 kinase (ERK1/2) pathway [17]. Similarly, controlled amounts of topographical noise on



Ongo *et al*, 2013

53 nanogratings of 500 nm ridges and grooves has shown to effect PC12 neuronal cell  
54 alignment to the gratings, focal adhesion maturation and directionality [18].

55

56 Randomness and noise are also highly relevant to directed cell migration. The  
57 stochasticity of chemo- and haptotaxis has been well studied, and is apparent from the  
58 random-walk like traces of migrating cells [19]. It is well understood that biological  
59 gradients, which appear continuous, are in fact quantized since they are comprised of  
60 individual molecules adsorbed to a surface. The distribution of these molecules is not  
61 deterministic, but stochastic at the nanoscale. The engagement of receptors from  
62 migrating cells with these guidance cues has been modeled within a stochastic  
63 framework [19,20]. Random variations in the gradient also occur at the microscale *in vivo*  
64 from the local accumulation of chemo- and haptotactic molecules that form concentration  
65 puncta [21]. Gradients formed by the expression of receptors from cells embedded in a  
66 tissue may become non-monotonic as particular cells over- and under- express a  
67 receptor relative to their position in the gradient [22]. Cells navigating through such a  
68 patchwork of microscale deviations must discriminate against local maxima and minima  
69 to sense the overarching gradient slope. It has been suggested that cells alternate  
70 between periods of sensitization and desensitization and are thereby capable of  
71 maintaining an overall response to long-range gradients [23].

72

73 Random pattern generation is well established, however many patterns are not random  
74 in the mathematical sense, and often implement only an approximation of randomness  
75 to varying degrees depending on the needs of the application. Firstly, computers  
76 typically generate 'pseudo-random' numbers that statistically approximate the properties  
77 of true random numbers using an algorithm based on an initial 'random seed' – generally  
78 a random bit. If this random seed is known, the set of pseudo-random numbers can be

Ongo *et al*, 2013

79 replicated. However, for most applications, pseudo-random numbers are  
80 indistinguishable from a true random number.

81

82 So-called random dot patterns are widely used in the reproduction of images and  
83 patterns using displays or printers that impose digitization and pixilation. Pixilation  
84 implies that pixels are positioned on a regular grid. Adjusting grayscale images to binary  
85 (black and white pixels) through halftoning is achieved by adjusting the ratio of black and  
86 white pixels in a local area, but if pixels are turned on and off according an ordered  
87 pattern, rendering artifacts (such as Moiré patterns) arise. By locally randomizing the  
88 pixels turned on or off while matching the overall desired grayscale, it is possible to  
89 avoid such rendering artifacts. These 'random-grid' patterns can be generated using an  
90 array of pseudo-random values and a threshold dictated by the local grey value used to  
91 determine which pixels are black or white (Fig. S1) [24]. With this approach, the value of  
92 each pixel is random, while the position of the pixels are fixed to an ordered grid. These  
93 random-grids have found application in the halftoning of images for display or printing  
94 [25] and the generation of random-dot stereograms for depth perception studies [26].

95

96 Random dot patterns also comprise dot patterns where the position of the dots is not  
97 constrained to a grid as described previously, but is instead randomized within a given  
98 space. However, pseudo-random distributions of the dots, when seen from afar, can  
99 appear noisy and inhomogeneous to the eye. Therefore, algorithms involving so-called  
100 quasi random numbers (also called low discrepancy sequences) are used to create  
101 patterns with a more uniform distribution that appears visually smooth [27]. "Quasi-  
102 random" is a broad term that encompasses numbers with a disordered distribution that  
103 lie between a (pseudo-)random distribution and a regular distribution [28]; a quasi-  
104 random distribution may closely resemble an ordered distribution than a random

Ongo *et al*, 2013

105 distribution upon close examination. Many different algorithms have been developed to  
106 produce quasi-random numbers. As an example, for liquid crystal displays, quasi-  
107 random dot patterns without overlap are generated by mimicking molecular dynamics in  
108 which two “molecules” cannot occupy the same space [29] or by iteratively repositioning  
109 overlapping dots until overlap is minimized [27].

110

111 Both random-grid and quasi-random patterns have been optimized to produce a  
112 pleasing (macroscopic) image to the eye by introducing a controlled amount of  
113 microscale disorder, avoiding both the viewing artifacts of regular arrays and the  
114 inhomogeneity of pseudo-random dot patterns. Cells however are microscopic and  
115 sense their environment at the micro- and nanoscale. At these scales, random grid or  
116 quasi-random distributions can be significantly different from a random one, and may not  
117 adequately reproduce the effect of a random pattern on cells. It is therefore necessary to  
118 establish an algorithm to produce random dot patterns that preserves randomness at the  
119 micro- and nanoscale to study the effect of random vs. regular dot patterns on cell  
120 navigation.

121

122 Here, we introduce continuous DNGs eliminating the stepwise density changes of the  
123 previously reported “step” design [14] with (i) ordered and (ii) pseudo-random positioning  
124 of nanodots, as well as (iii) non-monotonic DNGs that can be implemented using either  
125 (i) or (ii). We discuss various strategies to create noisy DNGs and outline the challenges  
126 in forming random DNGs with accurate slopes, and describe a novel algorithm with  
127 pseudo-random positioning of the dots and compensating for random, but predictable,  
128 dot overlap to achieve the desired coverage. The slope of random DNGs was measured  
129 and compared to the programmed density function, and their randomness verified using  
130 Ripley’s K-function. We generated an array of 100 ordered and random  $400 \times 400 \mu\text{m}^2$

Ongo *et al*, 2013

131 large DNGs made of  $200 \times 200 \text{ nm}^2$  nanodots, including monotonic and non-monotonic  
132 density curves, with a dynamic ranges spanning from 2.14 to 3.86 OM. Non-monotonic  
133 gradients produced here aim to introduce in a quantitative and repeatable manner  
134 “microscale noise” into surface-bound *in vitro* gradients. The entire array of 100 DNGs  
135 covers a  $35 \text{ mm}^2$  area and is comprised of more than 57 million nanodots. The DNG  
136 array was patterned onto a silicon (Si) wafer by electron-beam (e-beam) lithography, and  
137 was transferred onto glass slides by lift-off nanocontact printing of fluorescently labeled  
138 IgGs [14]. The fidelity of the replication process was evaluated by overlaying the DNG  
139 design with fluorescence microscopy images of the printed IgG proteins.

140

#### 141 **Materials and Methods**

142

#### 143 **Software & Computers**

144 Algorithms were developed in Matlab R2013a (Natick, MA, USA). Scripts of the ordered  
145 and random gradient algorithms are available for download upon request. A spreadsheet  
146 template (Microsoft Excel 2010) of gradient parameters was imported into Matlab for  
147 processing. The output for each gradient was a text file of coordinates formatted as a  
148 Caltech Intermediate Format (CIF) file. CIFs were imported into CleWin Version 4.1  
149 (WieWeb, MESA Research Institute at the University of Twente and Deltamask,  
150 Netherlands). Gradients were exported from CleWin as Bitmap (BMP) image files for  
151 verification of density using ImageJ 1.47 64-bit (National Institutes of Health, USA) and  
152 Matlab. The 100-gradient array was designed in L-edit (Tanner EDA, Monrovia, CA,  
153 USA). All software was run on a 2013 iMac computer with a 3.4 GHz Intel Core i7  
154 processor with 32 GB 1600 MHz DDR3 memory running Windows 7 through a bootcamp  
155 partition.

156

Ongo *et al*, 2013

157 **Electron-Beam Lithography**

158 A 4" Si wafer was coated with PMMA resist and the 100-gradient array was patterned by  
159 e-beam lithography (VB6 UHR EWF, Vistec, Montreal, QC, Canada), followed by  
160 reactive-ion etching (System100 ICP380, Plasmalab, Everett, WA, USA) 100 nm deep  
161 into the Si wafer.

162

163 **Stamp Fabrication**

164 After cleaning, the Si wafer was coated with perfluorooctyltriethoxysilane (Sigma-Aldrich,  
165 Oakville, ON, Canada) by vapor phase deposition. An accurate polymer copy of the  
166 wafer was obtained after double replication using polydimethylsiloxane (PDMS) and a  
167 UV-sensitive polyurethane as described in [14]. First, a 6 mm layer of 1:10 PDMS (Dow  
168 Corning, Corning, NY, USA) was poured on the wafer inside a Petri dish, followed by  
169 degassing under vacuum in a desiccator for 10 min. Next, the PDMS was cured in an  
170 oven for 24 h at 60 °C (VWR, Montreal, QC, Canada), then peeled from the wafer. To  
171 remove uncured monomers and other extractables, the PDMS replica was submersed in  
172 70% ethanol for 24 h then baked at 60°C for 4 h. Next, a drop of UV sensitive  
173 polyurethane (Norland Optical Adhesive 63 (NOA 63), Norland Products, Cranbury, NJ)  
174 was applied to the PDMS replica and cured by 600 W of UV light (Uvitron International,  
175 Inc., West Springfield, MA) for 30 s. The PDMS was then removed yielding an NOA  
176 replica of the original Si wafer pattern with 200 nm holes [14].

177

178 **Nanocontact Printing**

179 A flat PDMS stamp was cured against a perfluorooctyltriethoxysilane treated flat Si  
180 wafer. Following removal of the extractables as mentioned above, the flat PDMS stamp  
181 was inked with a 10 µL drop of phosphate buffered saline solution (PBS) containing 25  
182 µg/mL of chicken immunoglobulin G (IgG) conjugated to Alexa Fluor 488 (Invitrogen,

Ongo *et al*, 2013

183 Burlington, ON, Canada). A plasma activated hydrophilic coverslip was then placed on  
184 the drop to spread the solution evenly across the surface of the hydrophobic PDMS  
185 stamp during a 5 min incubation period. After rinsing with PBS and double distilled water  
186 for 15 s each, the inked stamps were briefly dried under a stream of N<sub>2</sub> and immediately  
187 brought into contact with a plasma activated (PlasmaEtch PE-50, PlasmaEtch, Carson  
188 City, NV, USA) NOA master for 5 s. The PDMS and NOA were separated and proteins in  
189 the contact regions were transferred to the NOA. The remaining proteins on the PDMS  
190 were transferred to the final substrate by printing the PDMS stamp for 5 s onto a plasma  
191 activated glass coverslip.

192

### 193 **Imaging and Analysis**

194 Images of the original Si master were collected using scanning electron microscopy  
195 (SEM, JEOL, Japan). DNGs of fluorescent IgGs were imaged by fluorescence  
196 microscopy (TE2000 microscope, Nikon, Canada and CoolSNAP HQ<sup>2</sup> camera,  
197 Photometrics, USA). Images of the Si wafer were captured with a Panasonic Lumix GH3  
198 DSLR equipped with an Olympus M. Zuiko Digital ED 60 mm macro lens. Dark field  
199 images were captured with an inspection microscope (LV150A microscope and Digital  
200 Sight DS-Fi1 camera, Nikon, Canada).

201

### 202 **Results and Discussion**

203

#### 204 **Ordered Gradient Algorithm**

205 Ordered DNGs with continuously changing density were programmed by forming  
206 columns of nanodots with equal vertical spacing while varying the spacing between  
207 columns horizontally (Fig. 1A). The density of the gradient at any point along the length /  
208 is dictated by an input density function  $D$ , and is realized by placing a single nanodot into

Ongo *et al*, 2013

209 a virtual box to form a unit cell. The dimensions  $d_i$  of the unit cell at the  $i^{\text{th}}$  column of  
 210 nanodots are given by the square root of the nanodot area  $A_{dot}$  divided by the density  
 211 value at the given position (Eq. 1). In this algorithm, the size of the nanodot remains  
 212 constant while the dimensions of the unit cell vary for each column of nanodots along the  
 213 length.

$$214 \quad d_i = \sqrt{\frac{A_{dot}}{D(l)}} \quad (1)$$

215 The unit cell is largest at low densities and decreases at higher densities, matching the  
 216 dimensions of the nanodot at a density equal to one. The unit cell dimensions for each  
 217 column are calculated using an iterative approach, starting from the first column of  
 218 nanodots at length zero. The position along the length for the next column of nanodots is  
 219 given by the cumulative sum of unit cell dimensions (Fig. 1B).

220

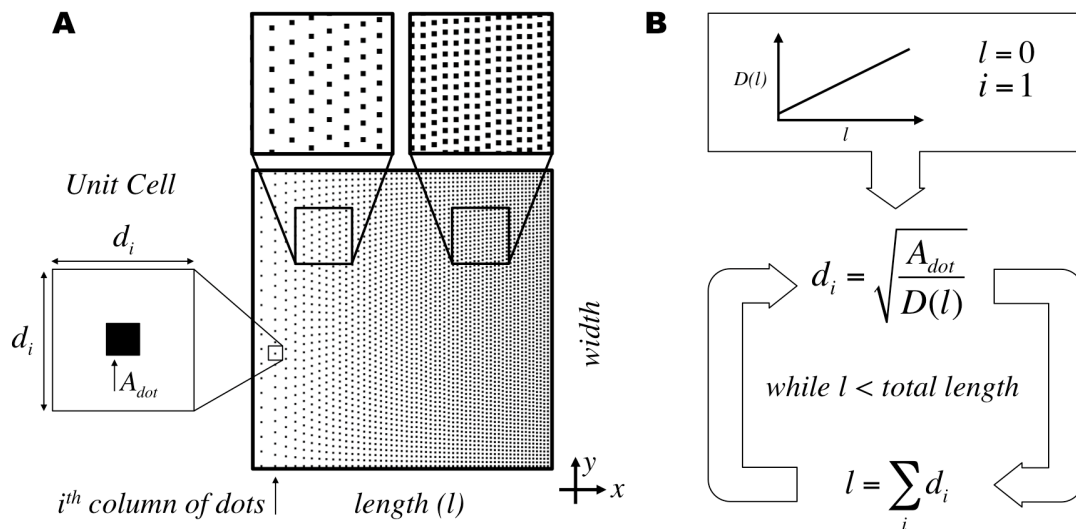

221

222 **Figure 1: Ordered gradient algorithm for continuously changing density in Digital**  
 223 **Nanodot Gradients (DNGs) using a unit cell approach.** (A) Schematic of a linear  
 224 DNG and unit cell parameters for the  $i^{\text{th}}$  column of nanodots. (B) Calculation of unit cell  
 225 dimensions at each position through an iterative process using the cumulative sum of  
 226 unit cell dimensions to determine position along the length.

227

Ongo *et al*, 2013

228 The width of the gradient is divided by  $d_i$  to estimate the number of nanodots in the  
229 column. The value of  $d_i$  is then recalculated to equally space the integer number of  
230 nanodots along the width, ensuring that the distribution of nanodots is symmetrical. The  
231 unit cells are concatenated to form a column of points in the  $y$  direction with constant  
232 spacing as multiples of  $d_i$ . The  $x$  coordinate for each column is the position  $l$  at which the  
233 unit cell dimensions are calculated. Thus, using this algorithm it is easy to form a  
234 gradient with any slope as the size of the unit cell is directly derived from the value of the  
235 density function at a specific position. Fig. 2 shows a linear density curve spanning from  
236 a minimum density  $D_{min}=0.01$  to a maximum density  $D_{max}=0.30$  (Eq. 2) with  
237 corresponding unit cell dimensions along the length of the gradient. Eq. 2 is normalized  
238 to span the dynamic range over the total length  $L=100 \mu m$  of the gradient.

239

240 
$$D(l) = (D_{max} - D_{min}) \frac{l}{L} + D_{min} \quad (2)$$

241



Ongo *et al*, 2013

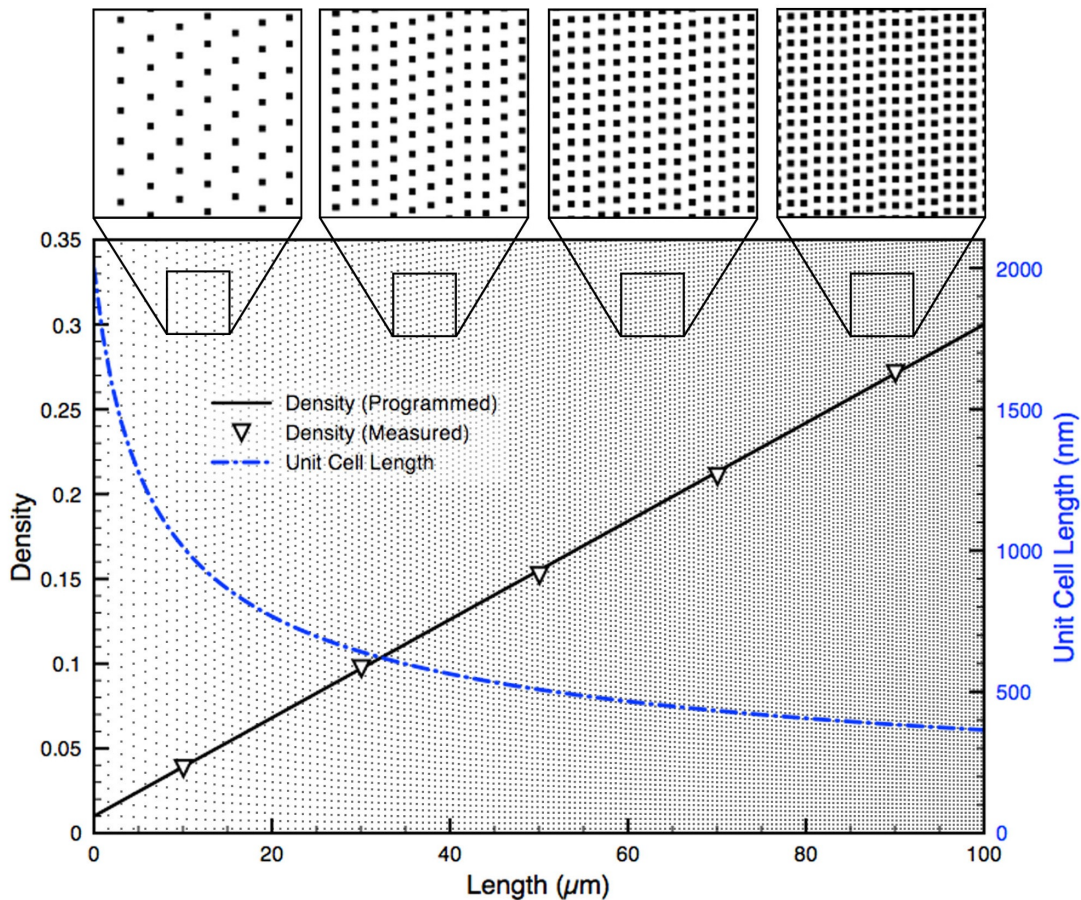

242

243 **Figure 2: Programmed and measured density for an ordered linear DNG.** A  $100 \times$   
244  $100 \mu\text{m}^2$  linear DNG comprised of  $0.04 \mu\text{m}^2$  nanodots and spanning from 0.01 to 0.30  
245 density. The measured density (left axis) precisely matches the programmed density  
246 ( $R^2=0.9998$ ). The unit cell dimensions (right axis) change with the inverse square root of  
247 the density. Top insets show various spacing of nanodots at positions along the DNG.  
248

249 To verify that ordered gradients matched the programmed density functions, gradients  
250 were exported as bitmap images and the ratio of black to white pixels, averaged over  
251 several columns of nanodots, was used to measure density. The resulting gradients  
252 were found to match the programmed density functions with high fidelity ( $R^2=0.9998$ ).  
253 Using this algorithm, a density of zero cannot be reached, as it would require an infinitely  
254 large unit cell. Consequently, when designing gradients of fixed length, the lowest  
255 density that is accessible may be limited since large unit cells are required at very low

Ongo *et al*, 2013

256 density.

257

### 258 **Random Gradient Algorithm**

259 Naturally occurring gradients appear continuous at the microscale, but are in fact digital  
260 at the scale of molecules and proteins. The diffusion of biomolecules is subject to  
261 Brownian motion, and is therefore expected to be random. In an effort to mimic the  
262 nanoscale noise present *in vivo*, we present an approach to produce DNGs with fully  
263 randomized nanodot positions. Similar to ordered DNGs, random gradients have  
264 increasing density along the length and constant density along the width.

265

266 Several strategies were considered to produce randomized DNGs. The first was akin to  
267 the one proposed by Dalby, *et al.* [16] and consisted of starting with a regular distribution  
268 of dots, and randomly displacing the nanodots within their “unit cell” so as to avoid  
269 overlap with neighboring dots. However because this approach only produces a quasi-  
270 random distribution, it was not pursued. A second approach that was considered was to  
271 start with a pseudo-random dot pattern, and then compensate for the overlap by locally  
272 moving dots. This parallels a strategy used in back-lit displays [29], however these  
273 patterns are unsuitable for our application due to the dependence on or optimization for  
274 quasi-random distributions. Whereas we don't see fundamental obstacles in developing  
275 an algorithm to randomly redistribute overlapping dots, such algorithms tend to be  
276 computationally intensive as the position of each dot needs to be tested against each  
277 other dot, and require multiple iterations to achieve the final distribution [27]. We thus  
278 devised a novel algorithm to create pseudo-random nanodot patterns for cell navigation  
279 that could translate arbitrary density functions into random nanodot patterns, and that  
280 was computationally economical.

281

Ongo *et al*, 2013

282 The algorithm we developed compensates for the random overlap of dots by adding an  
283 excess of dots to achieve the programmed density. The algorithm first defines equally  
284 sized boxes to smoothly replicate the programmed density function without visible steps.  
285 The number of nanodots within each box was calculated based on the density function  
286 with predicted overlap at the box's position, and random  $x$  and  $y$  coordinates were  
287 generated for each nanodot. Only the nanodot coordinates were stored. Noteworthy, the  
288 shape of the nanodots can be defined subsequently as the exported CIF file allows  
289 drawing shapes such as circles, polygons, etc. at the stored coordinates, thus making  
290 this approach flexible while reducing the file size and computation time. A consequence  
291 of the random nanodot position is that overlap between nanodots is possible. The  
292 frequency of overlap increases with density, which in turn results in a lower density than  
293 expected based on the surface area of all nanodots. However, because the distribution  
294 of the nanodots is random and the density known, the overlap is predictable, and can be  
295 compensated for, so that the designed DNG matches the density function with high  
296 fidelity. For each box with area  $A_{box}$ , we first compute the probability  $P_{cov}$  that any given  
297 point in the box is covered by a nanodot of area  $A_{dot}$  (Eq. 3).

298

299 
$$P_{cov} = \frac{A_{dot}}{A_{box}} \quad (3)$$

300

301 The probability  $P_{not\ cov}$  that this point will *not* be covered by the nanodot is simply  
302  $1 - P_{cov}$  (Eq. 4).

303

304 
$$P_{not\ cov} = \left(1 - \frac{A_{dot}}{A_{box}}\right) = \frac{A_{box} - A_{dot}}{A_{box}} \quad (4)$$

305

Ongo *et al*, 2013

306 The probability that this point will not be covered by  $N$  nanodots simultaneously can then  
307 be found (Eq. 5).

308

$$309 \quad P_{\text{not cov}} = \left( \frac{A_{\text{box}} - A_{\text{dot}}}{A_{\text{box}}} \right)^N \quad (5)$$

310

311 To determine the total area of the box covered by nanodots ( $A_{\text{cov}}$ ), the probability that a  
312 point *will* be covered is integrated over the area of the box (Eq. 6).

313

$$314 \quad A_{\text{cov}} = \int_0^{A_{\text{box}}} (1 - P_{\text{not cov}}) dA \quad (6)$$

315

$$316 \quad A_{\text{cov}} = A_{\text{box}} - \frac{(A_{\text{box}} - A_{\text{dot}})^N}{A_{\text{box}}^{N-1}} \quad (7)$$

317

318 Eq. 7 can then be solved for  $N$  to determine the number of nanodots required for a given  
319  $A_{\text{cov}}$  in each box.

320

$$321 \quad N = \frac{\log(1 - A_{\text{cov}} / A_{\text{box}})}{\log(1 - A_{\text{dot}} / A_{\text{box}})} \quad (8)$$

322

323 Using Eq. 8 it is possible to obtain the number of nanodots required for any given density  
324 by substituting  $D$  for  $A_{\text{cov}}/A_{\text{box}}$ . As the area occupied approaches the area of the box, the  
325 number of nanodots required increases rapidly, and is infinite for a density of 1. The  
326 maximum density for a DNG was thus set to 0.9999. Without compensation, at density of  
327 0.9999 would require 9,999 nanodots of  $200 \times 200 \text{ nm}^2$  to be seeded into a  $400 \times 1 \mu\text{m}^2$

Ongo *et al*, 2013

328 box to reach this density. When accounting for the overlap, 92,099 nanodots are  
329 required, roughly a tenfold increase. Thus, producing a typical linear gradient, ranging in  
330 density from 0.0002 to 0.4444 requires 1,061,307 nanodots and a computation time of  
331 4.56 min. The ordered algorithm for the same linear gradient requires 885,737 nanodots  
332 and a computation time of 3.88 min. Therefore, the random gradient algorithm overall  
333 required a 19.8% increase in nanodots and a 17.5% increase in computation time using  
334 our workstation. It is expected that the time will increase for random DNGs that reach a  
335 higher density.

336

337 We compared the programmed density with the measured density of a monotonic  
338 exponential curve with decay constant  $k$  (Eq. 9) using both the ordered and random  
339 gradient generation approaches. Eq. 9 is normalized to span the dynamic range over the  
340 length of the gradient. The random gradients produced with this algorithm were found to  
341 follow the programmed curve with high fidelity ( $R^2 = 0.99986$ ), and accurately match the  
342 measured density of ordered gradients produced with the same input function (Fig. 3).

343

344

$$D(l) = (D_{\max} - D_{\min}) \frac{e^{\frac{k \cdot l}{L}} - 1}{e^k - 1} + D_{\min} \quad (9)$$



Ongo *et al.*, 2013

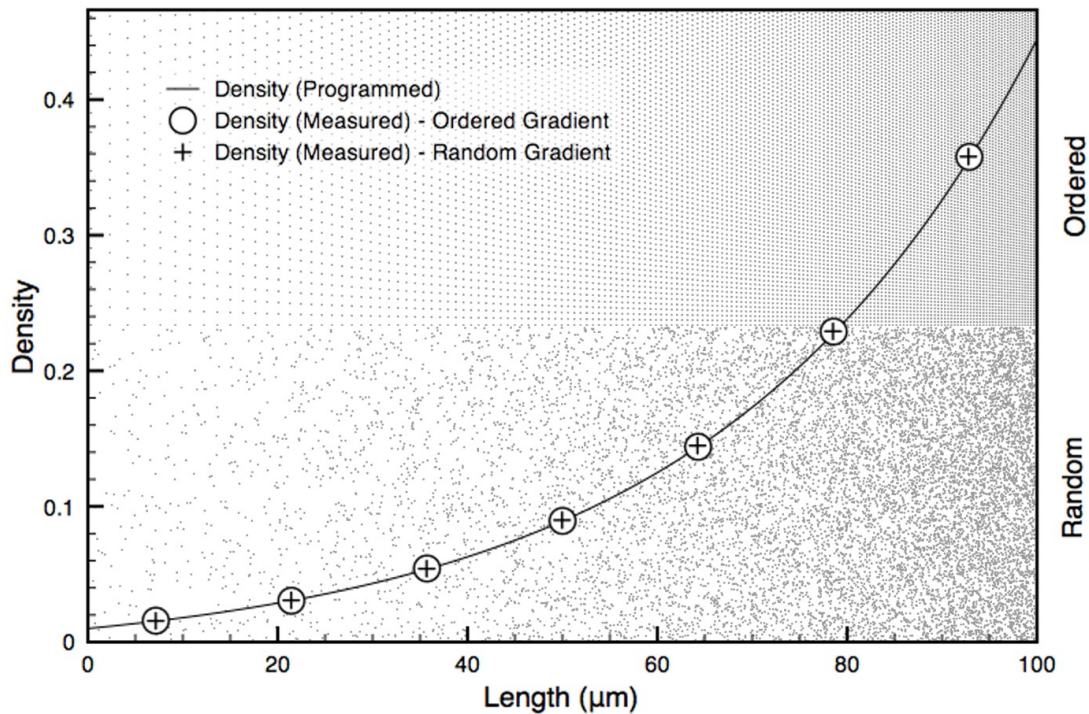

345  
 346 **Figure 3: Ordered and random DNGs superposed with their programmed**  
 347 **exponential density function and actual, measured density.** A  $100 \times 100 \mu\text{m}^2$   
 348 exponential ( $k=3$ ) DNG spanning from a density of 0.01 to 0.30 is shown in ordered (top  
 349 half) and random (bottom half) form. The random DNG was programmed by subdividing  
 350 it into  $1 \mu\text{m}$  wide boxes with random seeding of nanodots and compensating for overlap.  
 351 The measured density follows the programmed exponential curve with high fidelity for  
 352 both ordered ( $R^2=0.99996$ ) and random ( $R^2=0.99986$ ) DNGs.

353

354 The distribution of neighboring nanodots can be parsed to verify whether it satisfies the  
 355 conditions of randomness. Since density changes along the length of the DNG,  
 356 randomness can only be assessed in the direction of constant density, perpendicular to  
 357 the gradient. The randomness along each box was verified using Ripley's K function  
 358 based on the number of nanodots  $N_{p_i}$  within a distance  $s$  from the  $i^{\text{th}}$  point  $p_i$  taken over  
 359 the sum of all points  $n$  and normalized by the area  $\lambda$  (Eq. 10).

360

361

$$K(s) = \frac{1}{n} \sum_{i=1}^n N_{p_i}(s) / \lambda \quad (10)$$

Ongo *et al*, 2013

362

363 For a homogenous, random Poisson distribution, the expected value of Eq. 10 is  $\pi s^2$ .

364 Deviations from  $\pi s^2$  indicate regions of clustering or dispersion [31]. Using the

365 coordinates of nanodots from the DNGs,  $K(s)$  was found to lie within a 95% confidence

366 interval obtained from 10 simulations of randomly distributed coordinates at the same

367 density. This suggests the nanodots are spatially homogenous and randomly distributed

368 compared to ordered gradients, which lie outside the confidence interval (Fig. 4).

369

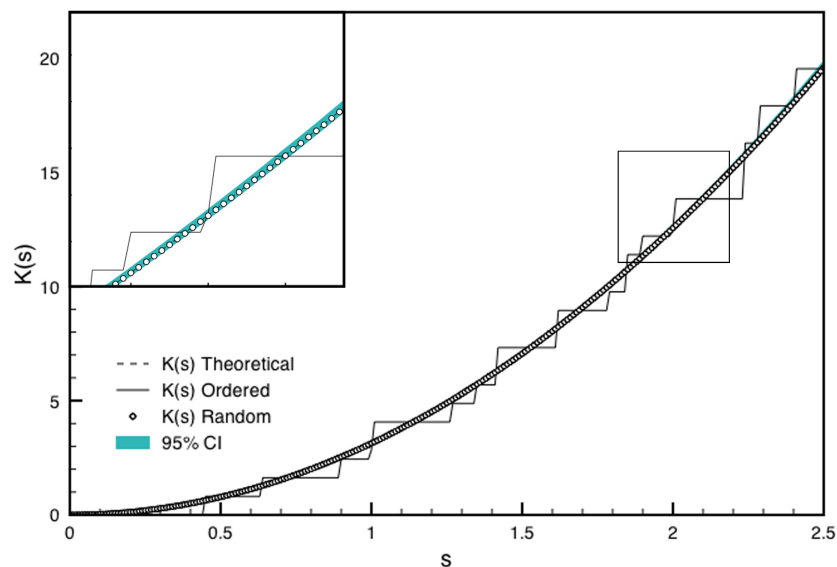

370

371 **Figure 4: Ripley's K analysis for randomness and spatial homogeneity of a sample**  
372 **box produced with the ordered and random DNG algorithms.**  $K(s)$  for ordered and  
373 random gradients for a  $10 \times 400 \mu\text{m}^2$  box at 0.20 density are shown. A 95% confidence  
374 interval was calculated as 1.96 times the standard deviation of  $K(s)$  from 10 simulations  
375 of randomly distributed points at 0.20 density. The inset shows a magnified portion of the  
376 graph indicated by the box.  
377

### 378 Non-monotonic gradients

379 We have shown that linear and exponential gradients can be produced using either the

380 ordered or random algorithms. These curves are monotonic, meaning they only ever

381 increase or decrease. Given the approaches outlined here, more complex gradients can

Ongo *et al*, 2013

382 be easily generated from any input density function, specifically non-monotonous curves.  
383 To study the ability of cells to recognize an average gradient in a non-monotonous  
384 environment, we propose linear and exponential gradients that are superposed with  
385 sinusoidal functions with either constant amplitude, or with linear or exponentially  
386 changing amplitude. In the anticipation of future cell experiments, we also programmed a  
387 series of sinusoids with varying frequency and amplitude, while having an average slope  
388 of zero to act as negative controls.

389

390 Here, we demonstrate the flexibility of the algorithms with the production of non-  
391 monotonic gradients. One such gradient produced is a sinusoid with exponentially  
392 increasing amplitude superposed an exponential gradient. Eq. 11 gives the input density  
393 function for such a curve, where  $A$  is the amplitude,  $B$  is the number of oscillations, and  
394  $k_1$  and  $k_2$  are the decay constants for the average gradient and amplitude of the sinusoid,  
395 respectively.

396

397 
$$D(l) = (D_{\max} - D_{\min}) \frac{e^{k_1 \frac{l}{L}} - 1}{e^{k_1} - 1} + A \sin\left(2\pi B \frac{l}{L}\right) \frac{e^{k_2 \frac{l}{L}} - 1}{e^{k_2} - 1} + D_{\min} \quad (11)$$

398



Ongo *et al.*, 2013

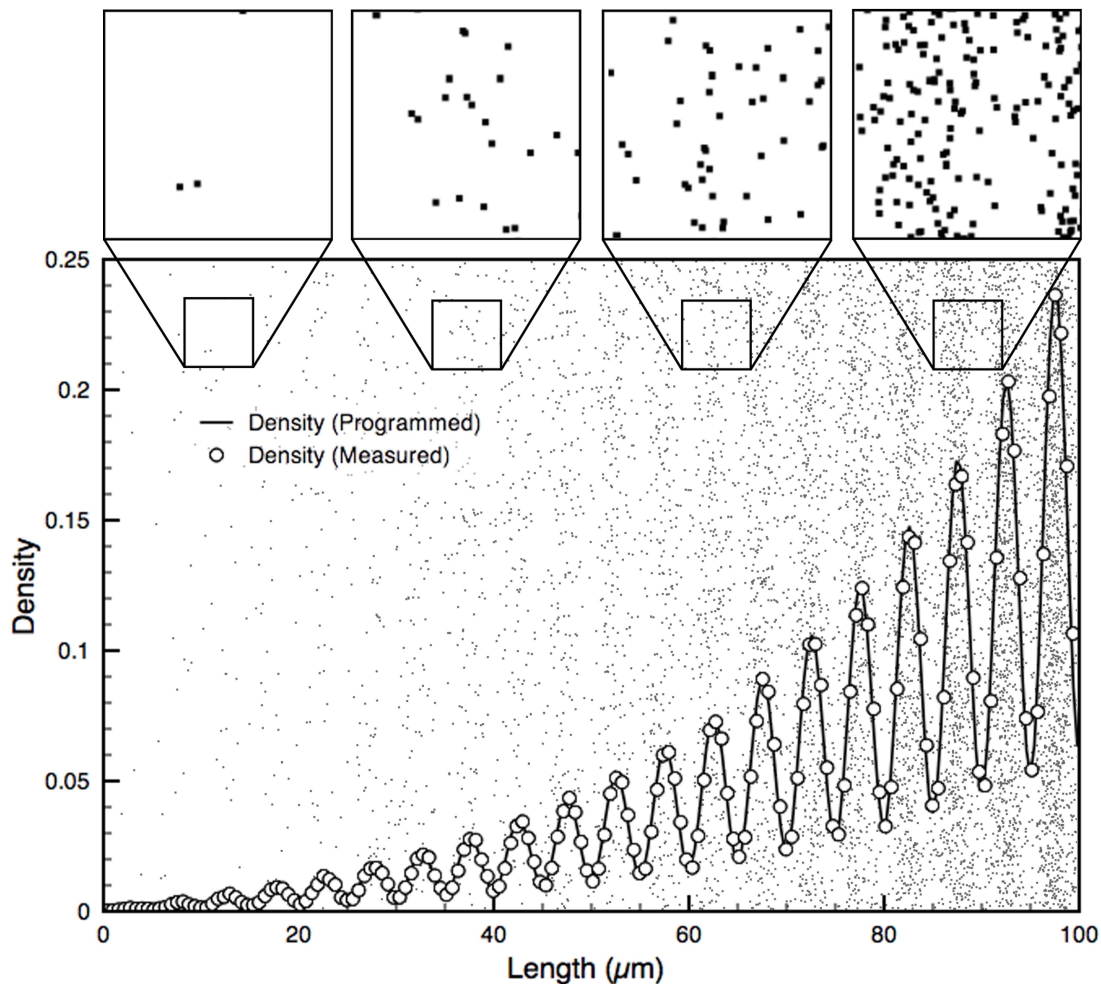

399  
400  
401  
402  
403  
404  
405  
406

**Figure 5. Non-monotonic random DNG superposed with its density function and actual, measured density.** A  $100 \times 100 \mu\text{m}^2$  non-monotonic DNG. The programmed density function (line) is a sinusoid ( $A=0.10$ ,  $B=20$ ) with an average exponential trend ( $k_1=3$ ) and exponentially increasing amplitude ( $k_2=3$ ). Measured density from bitmap (circles) accurately follows the programmed function ( $R^2=0.9988$ ). Insets show close-up views of nanodots and reveal increasing overlap of nanodots at higher densities.

407

### One-Hundred-Gradient Array

408

The flexibility of the gradient algorithms and the fabrication method discussed below was

409

leveraged by producing an array of 100 distinct gradients within a  $35 \text{ mm}^2$  area (Fig. 6,

410

Table. S1). The array is comprised of 20 ordered and 80 random gradients, with

411

densities ranging from 0.0002 to 0.4444 for a maximum dynamic range of 3.85 OM. For

412

ordered gradients, this corresponds to a maximum pitch of  $14.8 \mu\text{m}$  at low density, and

Ongo *et al*, 2013

413 100 nm at high density. The minimum density is limited by the size of the cell and its  
414 capacity to sense the gradient, *i.e.* the cell will not sense the gradient if dot spacing  
415 exceeds one third the size of the cell, which we previously assessed using the migratory  
416 response of C2C12 myoblasts [14]. The maximum density is defined by the resolution of  
417 e-beam lithography, which limits the minimum pitch to 100 nm. To address how  
418 randomness affects cell navigation, 20 gradients (10 linear and 10 exponential) were  
419 produced as both ordered (#1-20) and random (#81-100) gradients. This portion of the  
420 array will serve to address gradient sensing mechanics for cell migration that may arise  
421 from either (i) the absolute concentration of the gradient at a given location or (ii) the  
422 concentration ratio between the cell's leading and trailing edges.

423

424 The other 60 gradients are non-monotonic and random. These consist of 14 sinusoids  
425 with no average slope (#21-34) that serve as controls. These vary in frequency and  
426 amplitude, and may have constant or increasing amplitude along their length. Controls  
427 for ordered gradients were designed in our prior work. The remaining 46 gradients (#35-  
428 80) have sinusoidal curves with various levels of complexity. These include sinusoids  
429 with linearly (#41-60) and exponentially (#61-80) increasing average density, and non-  
430 monotonic functions with linearly increasing amplitude and average density (#35-36) and  
431 exponentially increasing amplitude and average density (#37-40) to demonstrate the  
432 flexibility of this new approach in gradient generation. As discussed, the sinusoidal  
433 curves with different amplitude and frequency may introduce obstacles for cells trying to  
434 sense the overarching gradient, and replicate effects that may occur due to cell  
435 "mosaicism" in a controlled manner.

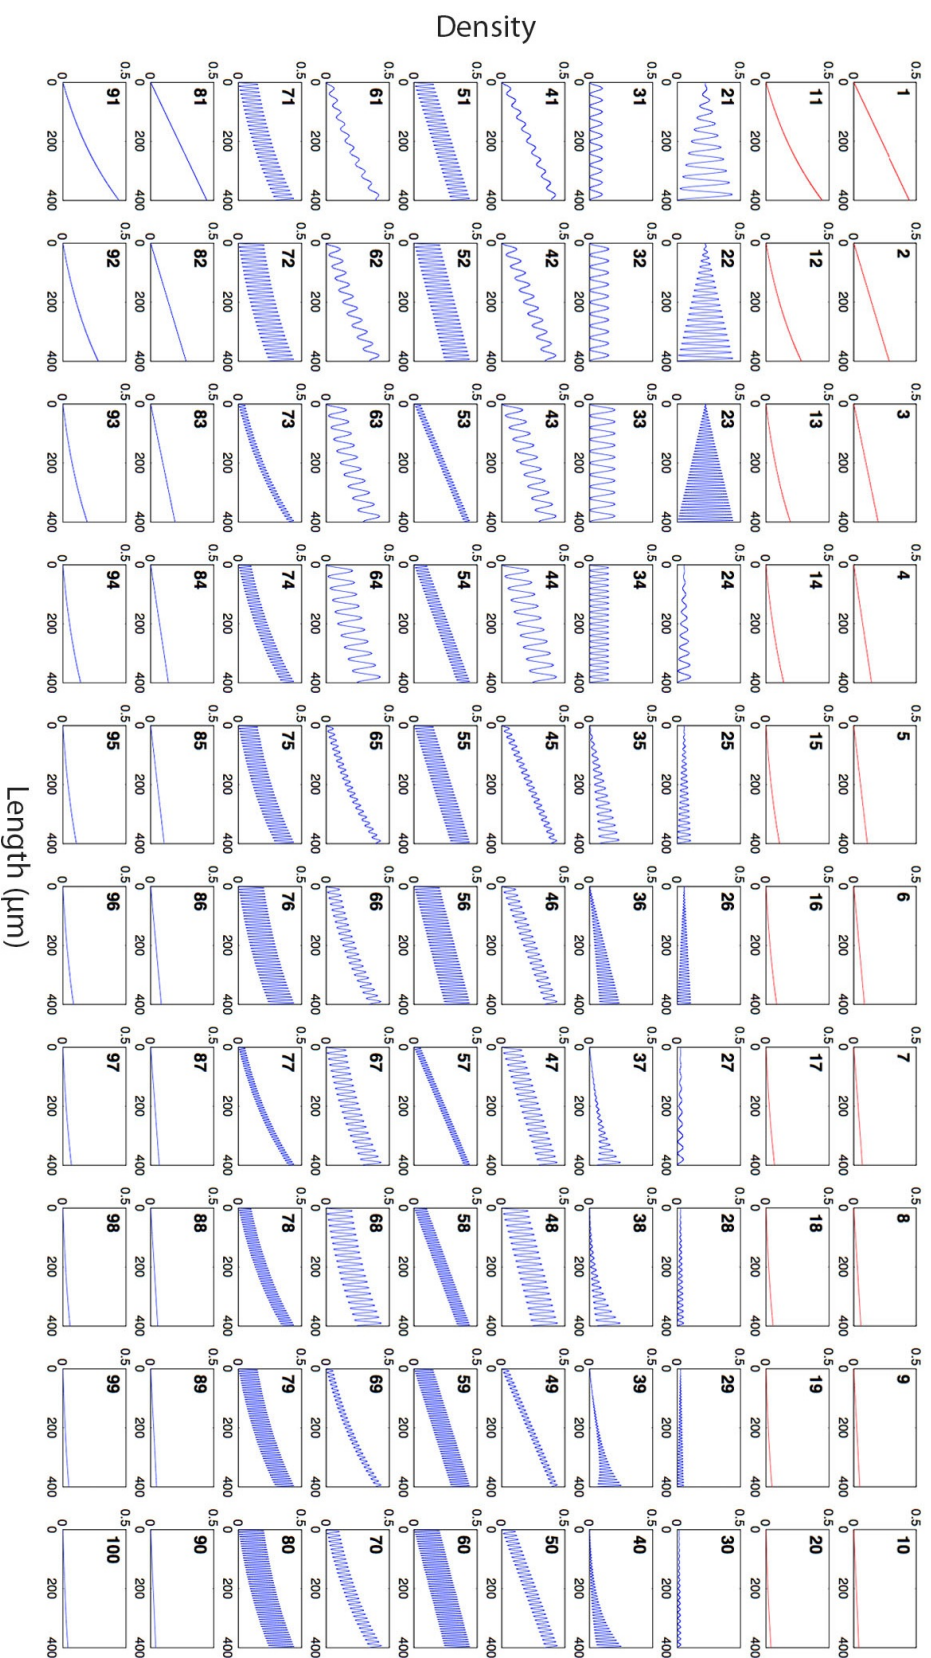

1  
2 **Figure 6: Density functions of the array of 100 DNGs.** Each box shows the density function of one gradient. Functions 1-20 were  
3 produced with the ordered gradient algorithm (red), and functions 21-100 were produced with the random gradient algorithm (blue).  
4 Functions 1-10 and 81-90 are linear. Functions 11-20 and 91-100 are exponential. Functions 21-34 are sinusoidal with no slope  
5 (controls), where 21-30 have linearly increasing amplitude and 31-34 have constant amplitude. Functions 35-36 feature a linear slope  
6 superposed with a sinusoid that has linearly increasing amplitude. Functions 37-40 feature an exponential slope superposed with a  
7 sinusoid that has exponentially increasing amplitude. Functions 41-60 have a constant slope superposed with a sinusoid of constant  
8 amplitude. Functions 61-80 are exponential slopes superposed with sinusoids of constant amplitude.



Ongo *et al*, 2013

## 1 Gradient Array Fabrication

- 2 The hundred-gradient array was etched 100 nm deep into a Si wafer by e-beam  
3 lithography (Fig. 7). The integrity of individual dots for ordered and random gradients  
4 was confirmed by scanning electron microscopy (SEM) (Fig. 8).

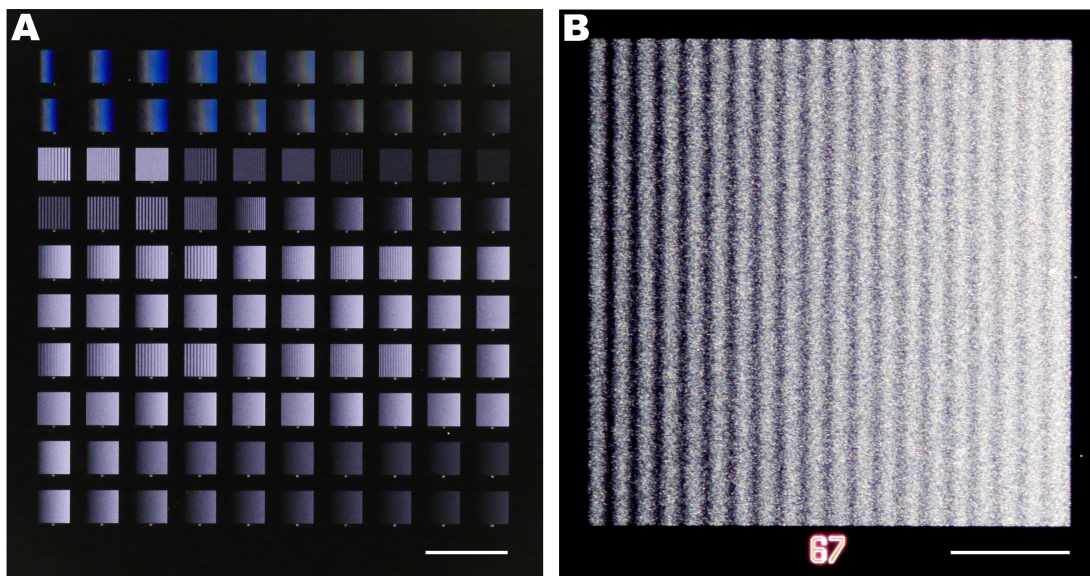

6 **Figure 7: Optical images of the 100-gradient-array.** The 100 DNGs were patterned  
7 into a Si wafer using e-beam lithography. (A) Image of all gradients; scale bar is 1 mm.  
8 (B) Dark-field image of DNG 67 which is a random sinusoid with exponentially increasing  
9 average density; scale bar is 100  $\mu\text{m}$ .  
10

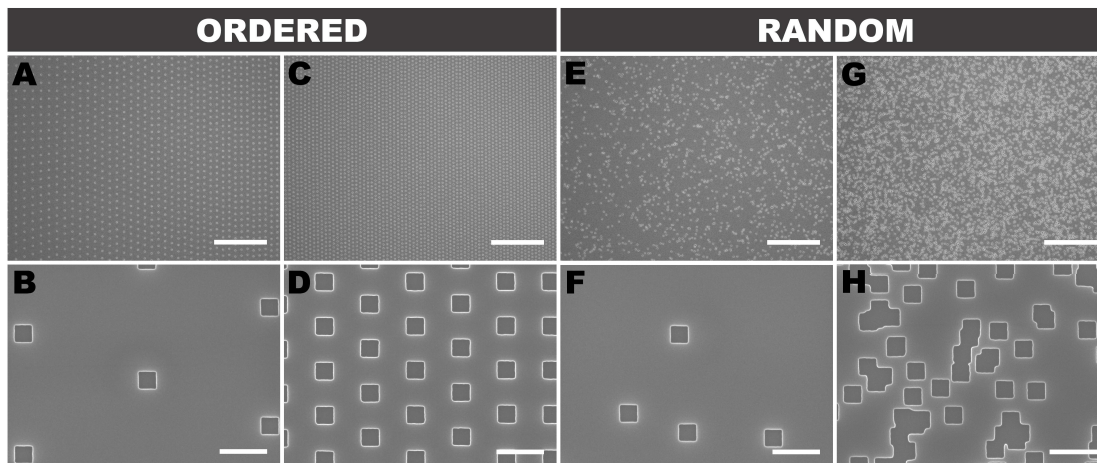

12 **Figure 8: Nanodot distribution in ordered and random DNGs.** SEMs of ordered (A-D)  
13 and random (E-H) exponential gradients at low (A, B, E, F) and high (C, D, G, H) densities.  
14 (H) highlights the random overlap between nanodots that is compensated for by the  
15 random DNG algorithm. Scale bars are 10  $\mu\text{m}$  (top row) and 500 nm (bottom row).

Ongo *et al*, 2013

16 To translate the etched Si wafer into substrate-bound protein gradients, we employed  
17 lift-off nanocontact printing [14]. First, a PDMS intermediate replica was produced,  
18 followed by a second replication into low-cost Norland Optical Adhesive. A flat PDMS  
19 stamp was inked with a protein solution, and through contact with the plasma-activated  
20 NOA lift-off stamp, a monolayer of protein was selectively removed from the surface of  
21 the flat stamp leaving behind the digital nanodot protein pattern. Next, the flat PDMS  
22 stamp was brought into contact with a plasma-activated glass slide to transfer the DNG  
23 pattern. To confirm the accuracy of the replication and printing process, images of the  
24 design and the printed protein DNG were digitally overlapped and compared (Fig. 9),  
25 revealing a high fidelity between the two patterns.

26

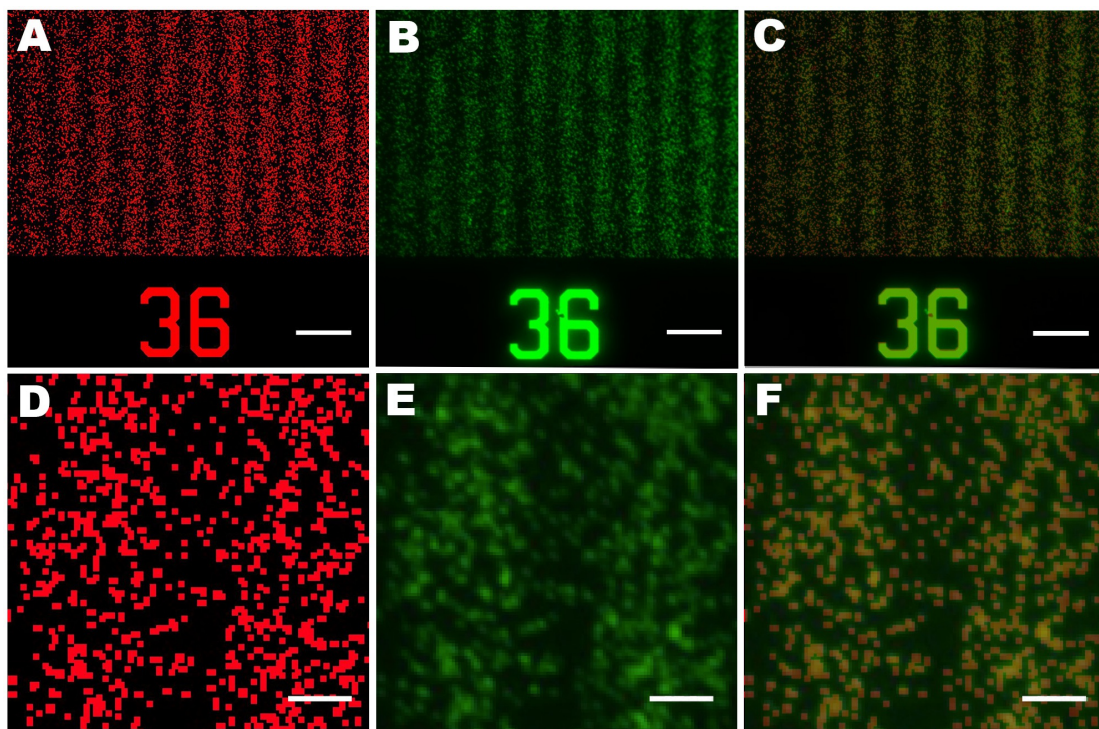

27

28 **Figure 9: The printed nanodot pattern accurately replicates the design. Bitmap**  
29 **image of the programmed design colored in red (A, D) compared with a fluorescent**  
30 **image of nanocontact printed IgG by lift-off (B, E, green) and merged (C, F). In the inset**  
31 **(E), out of ~1000 spots, 21 are missing, indicating that the replication works well. Scale**  
32 **bars A-C are 10 µm, scale bars D-F are 2 µm.**

Ongo *et al*, 2013

33

34 The pattern overlay in Fig. 9 was characterized by thresholding the printed image with  
35 boundaries of 31 and 255 in ImageJ and comparing it to the bitmap image (Fig. S3). The  
36 total number of nanodots is difficult to determine owing to the random overlap, but we  
37 estimate that there are ~1000 spots, and using the above threshold, 21 were not found  
38 in the print. Overall, the transfer process is thus accurate to ~98% in this example. Dust  
39 particles on the Si wafer or on the intermediate PDMS replica, or mechanical damage  
40 due to the replication process could account for the absence of these protein dots.  
41 Whereas the fidelity of the replication and printing process is thus high, it might be  
42 improved further by employing more durable polymers during the replication process as  
43 well as by working in a cleanroom environment throughout.

44

#### 45 **Conclusion**

46 Patterned substrate-bound protein gradients are a valuable tool to study a number of  
47 biological processes such as neuronal development or regeneration. The novel  
48 algorithms presented here, providing pseudo-randomness at a scale commensurate to  
49 the cellular level, can provide control over geometry and noise in DNGs. Combined with  
50 high-throughput patterning, an array of one hundred DNGs with linear, exponential, and  
51 non-monotonic slopes featuring 57 million spots over an area of 35 mm<sup>2</sup> can be  
52 patterned at once in a matter of minutes. The diversity of DNGs shown here will help  
53 study and quantify the mechanisms by which cells sense and navigate through  
54 immobilized gradients. There are many opportunities for refining digital nanodot patterns.  
55 Firstly, to mimic the self-repellent nature of proteins adsorbing to surfaces, it might be  
56 useful to develop an algorithm that prevents, or limits, the overlap of nanodots.  
57 Secondly, whereas here two sinusoidal curves were superposed in one direction, such  
58 curves might be generated in two perpendicular directions and create two- dimensional

Ongo *et al*, 2013

59 navigation landscape while better mimicking local accumulation of guidance cues as  
60 puncta. Thirdly, it might be possible to program density functions that introduce clusters  
61 of noise that more accurately replicate the noise and mosaicism imposed by individual  
62 cells *in vivo* which can extend over tens of micrometers. Fourthly, it should be possible to  
63 pattern overlapping DNGs of different proteins that run in the same, or different  
64 directions, as well as produce any type of navigational landscapes that are found *in vivo*  
65 simply by converting the recorded densities into digital nanodot patterns, following the  
66 trend of rapid prototyping of replicas of living tissues [32]. Before expanding the nanodot  
67 patterning, it will be important to test and validate the current DNGs and establish the  
68 optimal conditions along with the suitable non-patterned reference surfaces for each  
69 study [33].

70

#### 71 **Acknowledgments**

72 We acknowledge Nabila Zaman for her help with gradient algorithms, and Marta  
73 Garnelo-Abellanas and Veronique Laforte for proofreading this article.



Ongo *et al*, 2013

## References

1. McLaughlin T, O'Leary DDM (2005) Molecular gradients and development of retinotopic maps. *Annu Rev Neurosci* 28: 327-355.
2. Chung BG, Flanagan LA, Rhee SW, Schwartz PH, Lee AP, et al. (2005) Human neural stem cell growth and differentiation in a gradient-generating microfluidic device. *Lab on a Chip* 5: 401-406.
3. Goodman CS (1996) Mechanisms and molecules that control growth cone guidance. *Annual Review of Neuroscience* 19: 341-377.
4. Kim BK, Lee JW, Park PJ, Shin YS, Lee WY, et al. (2009) The multiplex bead array approach to identifying serum biomarkers associated with breast cancer. *Breast Cancer Res* 11: R22.
5. Lander AD, Nie Q, Wan FYM (2002) Do morphogen gradients arise by diffusion? *Developmental Biology* 247: 471-471.
6. Gurdon JB, Bourillot PY (2001) Morphogen gradient interpretation. *Nature* 413: 797-803.
7. Keenan TM, Folch A (2008) Biomolecular gradients in cell culture systems. *Lab on a Chip* 8: 34-57.
8. Joanne Wang C, Li X, Lin B, Shim S, Ming G-I, et al. (2008) A microfluidics-based turning assay reveals complex growth cone responses to integrated gradients of substrate-bound ECM molecules and diffusible guidance cues. *Lab on a Chip* 8: 227-237.
9. Mai J, Fok L, Gao HF, Zhang X, Poo MM (2009) Axon Initiation and Growth Cone Turning on Bound Protein Gradients. *Journal of Neuroscience* 29: 7450-7458.
10. Dertinger SKW, Jiang XY, Li ZY, Murthy VN, Whitesides GM (2002) Gradients of substrate-bound laminin orient axonal specification of neurons. *Proceedings of the National Academy of Sciences of the United States of America* 99: 12542-12547.
11. Von Philipsborn AC, Lang S, Bernard A, Loeschinger J, David C, et al. (2006) Microcontact printing of axon guidance molecules for generation of graded patterns. *Nature Protocols* 1: 1322-1328.
12. Coyer SR, García AJ, Delamarche E (2007) Facile Preparation of Complex Protein Architectures with Sub-100-nm Resolution on Surfaces. *Angewandte Chemie International Edition* 46: 6837-6840.
13. von Philipsborn AC, Lang S, Loeschinger J, Bernard A, David C, et al. (2006) Growth cone navigation in substrate-bound ephrin gradients. *Development* 133: 2487-2495.
14. Ricoult SG, Pla-Roca M, Safavieh R, Lopez-Ayon GM, Grütter P, et al. (2013) Large Dynamic Range Digital Nanodot Gradients of Biomolecules Made by Low-Cost Nanocontact Printing for Cell Haptotaxis. *Small* 9: 3308-3313.
15. Raser JM, O'Shea EK (2005) Noise in gene expression: Origins, consequences, and control. *Science* 309: 2010-2013.
16. Dalby MJ, Gadegaard N, Tare R, Andar A, Riehle MO, et al. (2007) The control of human mesenchymal cell differentiation using nanoscale symmetry and disorder. *Nature Materials* 6: 997-1003.
17. Kantawong F, Burgess KEV, Jayawardena K, Hart A, Burchmore RJ, et al. (2009) Whole proteome analysis of osteoprogenitor differentiation induced by disordered nanotopography and mediated by ERK signalling. *Biomaterials* 30: 4723-4731.
18. Tonazzini I, Meucci S, Faraci P, Beltram F, Cecchini M (2013) Neuronal differentiation on anisotropic substrates and the influence of nanotopographical noise on neurite contact guidance. *Biomaterials* 34: 6027-6036.



Ongo *et al*, 2013

19. Dickinson R, Tranquillo R (1993) A stochastic model for adhesion-mediated cell random motility and haptotaxis. *Journal of Mathematical Biology* 31: 563-600.
20. Smith JT, Elkin JT, Reichert WM (2006) Directed cell migration on fibronectin gradients: Effect of gradient slope. *Experimental Cell Research* 312: 2424-2432.
21. Weber M, Hauschild R, Schwarz J, Moussion C, de Vries I, et al. (2013) Interstitial Dendritic Cell Guidance by Haptotactic Chemokine Gradients. *Science* 339: 328-332.
22. Sweetser DA, Birkenmeier EH, Hoppe PC, McKeel DW, Gordon JI (1988) Mechanisms underlying generation of gradients in gene expression within the intestine: an analysis using transgenic mice containing fatty acid binding protein-human growth hormone fusion genes. *Genes & Development* 2: 1318-1332.
23. Ming GL, Wong ST, Henley J, Yuan XB, Song HJ, et al. (2002) Adaptation in the chemotactic guidance of nerve growth cones. *Nature* 417: 411-418.
24. Pappas TN (1994) Digital Halftoning Techniques for Printing. *Icps '94: The Physics and Chemistry of Imaging Systems - Is&T's 47th Annual Conference, Vols I and II*: 468-471.
25. Ulichney R (1987) *Digital halftoning*: MIT press.
26. Dev P (1975) Perception of Depth Surfaces in Random-Dot Stereograms - Neural Model. *International Journal of Man-Machine Studies* 7: 511-528.
27. Imamichi T, Numata H, Mizuta H, Ide T (2011) Nonlinear Optimization to Generate Non-Overlapping Random Dot Patterns. *Proceedings of the 2011 Winter Simulation Conference (Wsc)*: 2414-2425.
28. Dalal IL, Stefan D, Harwayne-Gidansky J (2008) Low Discrepancy Sequences for Monte Carlo Simulations on Reconfigurable Platforms. *2008 International Conference on Application-Specific Systems, Architectures and Processors*: 108-113.
29. Chang JG, Su MH, Lee CT, Hwang CC (2005) Generating random and nonoverlapping dot patterns for liquid-crystal display backlight light guides using molecular-dynamics method. *Journal of Applied Physics* 98.
30. Thimbleby HT, Inglis S, Witten IH (1994) Displaying 3d Images - Algorithms for Single-Image Random-Dot Stereograms. *Computer* 27: 38-&.
31. Kiskowski MA, Hancock JF, Kenworthy AK (2009) On the Use of Ripley's K-Function and Its Derivatives to Analyze Domain Size. *Biophysical journal* 97: 1095-1103.
32. Derby B (2012) Printing and Prototyping of Tissues and Scaffolds. *Science* 338: 921-926.
33. Ricoult SG, Thompson-Steckel G, Correia JP, Kennedy TE, Juncker D (2014) Tuning cell-surface affinity to direct cell specific responses to patterned proteins. *Biomaterials* 35: 727-736.

Ongo *et al*, 2013

1 **Supplementary Material**

2

3

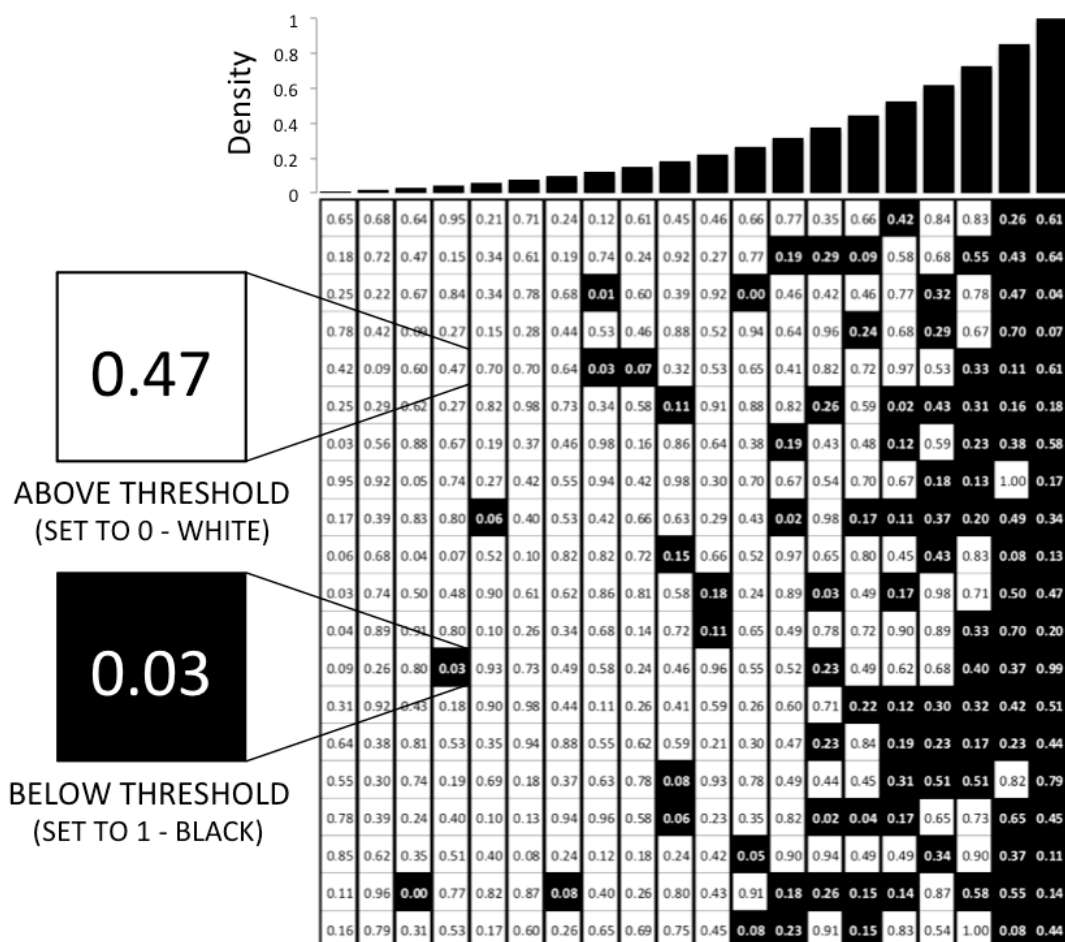

4

5

6

7

8

9

10

11

12

13

14

15

16

**Figure S1: Random gradients produced by a random matrix threshold approach.** A matrix of pseudo-random numbers is generated. Values greater than or equal to the density threshold are set to 0 (white), while values less than the threshold are set to 1 (black). The binary array can then be exported directly as a bitmap image file. Each nanodot is represented by one pixel. Thus, for a  $400 \times 400 \mu\text{m}^2$  sized area with  $200 \times 200 \text{ nm}^2$  nanodots, a  $2000 \times 2000$  matrix with 4 million values is required. This approach does not provide a fully random configuration since nanodots are aligned to a grid. While these patterns appear random to the eye, the underlying grid might be sensed at the cellular scale. Theoretically, it is possible to further randomize the position of dots by subdividing the area, e.g. using a 50 nm grid to position and draw  $200 \times 200 \text{ nm}^2$  pixels, but this would come at the cost of increased computational requirements and the possibility of overlap between adjacent dots.

Ongo *et al*, 2013

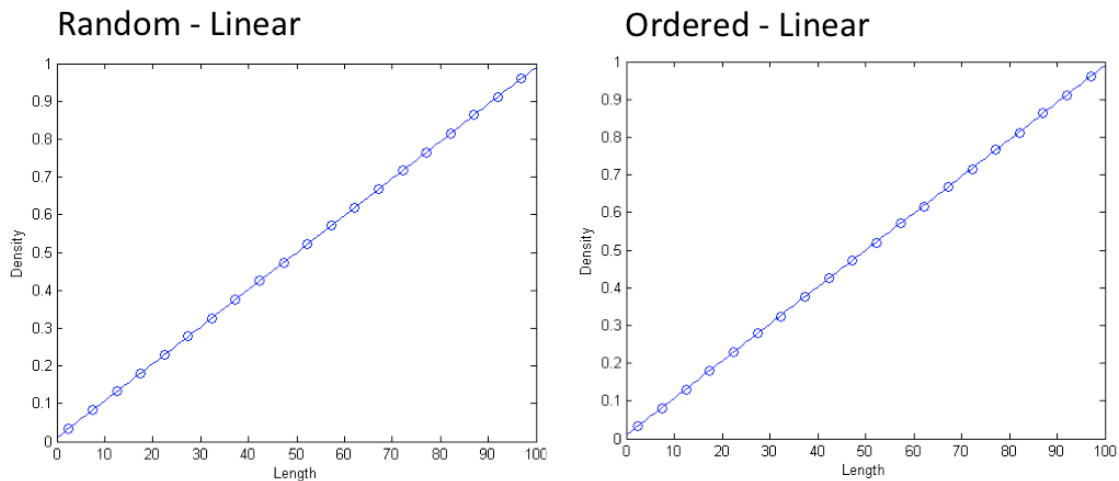

17

18

19

20

21

22

**Figure S2: Ordered and random measured density matches programmed density over full range.** Linear gradients from densities of 0.01 to 0.99 were shown to match (dots) the programmed functions (line) with high fidelity for both ordered ( $R^2 = 0.9988$ ) and random ( $R^2 = 1.0000$ ) gradients. Using either approach, a high dynamic range can be achieved with near perfect match to the programmed function.

23

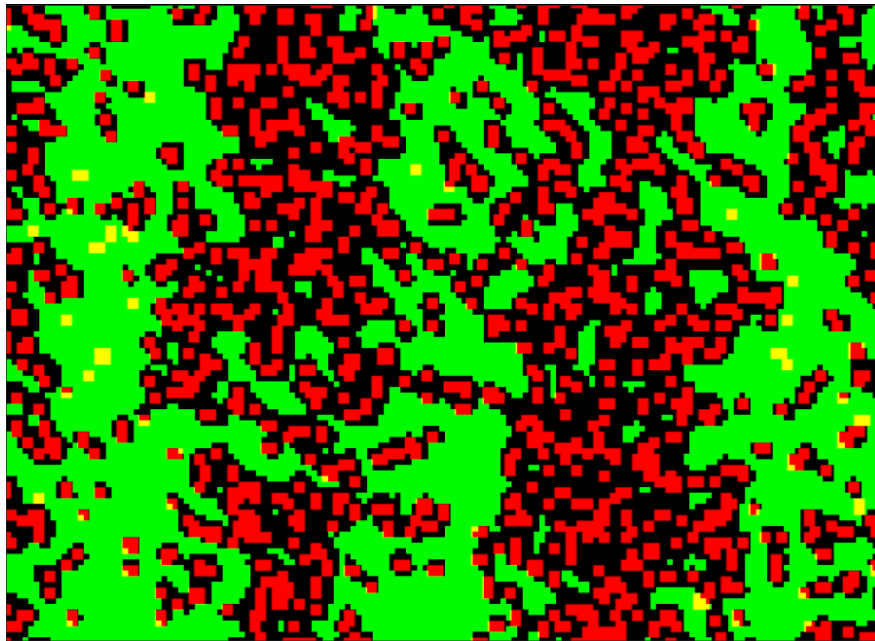

24

25

26

27

28

29

30

**Figure S3: Image processing procedure to assess alignment of the DNG design and print.** The fluorescent image of nanocontact printed IgG was first thresholded in ImageJ with boundary values of 31 and 255. The image was then transformed to binary and the binary values inverted to facilitate visualization. The edited fluorescent image (green) was then merged with the bitmap (red) and yellow dots, indicative of non-printed dots, were counted to determine to what extent the print matched the design.
